# Supplementary material for: Macronutrient Composition and Food Form Affect Glucose and Insulin Responses in Humans
Source: PubMed Central journal article supplement (PMC5852764; doi:10.3390/nu10020188), 2018-02-08
Supplement: nutrients-10-00188-s001.pdf [file nutrients-10-00188-s001.pdf]

**Table S1.** The correct level of significance according to the method described by Benjamini Hochberg.

| <b>Variables<sup>1</sup></b>       | <b><i>p</i>-values(<i>p</i>&lt;0.05)</b> | <b>Correct <i>p</i>-value (<i>p</i>&lt;0.023)</b> |
|------------------------------------|------------------------------------------|---------------------------------------------------|
| AUCG CP vs CAP                     | 0.778                                    | 0.0431                                            |
| GI CP vs CAP                       | 0.9                                      | 0.0472                                            |
| AUCI CP vs CAP                     | 0.074                                    | 0.0319                                            |
| II CP vs CAP                       | 0.035                                    | 0.0264                                            |
| 0 glucose response CP vs CAP       | 0.067                                    | 0.0306                                            |
| 15 min glucose response CP vs CAP  | 0.221                                    | 0.0389                                            |
| 30 min glucose response CP vs CAP  | 0.826                                    | 0.0444                                            |
| 45 min glucose response CP vs CAP  | 0.177                                    | 0.0347                                            |
| 60 min glucose response CP vs CAP  | 0.861                                    | 0.0458                                            |
| 90 min glucose response CP vs CAP  | 0.055                                    | 0.0278                                            |
| 120 min glucose response CP vs CAP | 0.002                                    | 0.01                                              |
| 0 insulin response CP vs CAP       | 0.975                                    | 0.05                                              |
| 15 min insulin response CP vs CAP  | 0.221                                    | 0.0403                                            |
| 30 min insulin response CP vs CAP  | 0.925                                    | 0.0486                                            |
| 45 min insulin response CP vs CAP  | 0.035                                    | 0.025                                             |
| 60 min insulin response CP vs CAP  | 0.158                                    | 0.0333                                            |
| 90 min insulin response CP vs CAP  | 0.064                                    | 0.292                                             |
| 120 min insulin response CP vs CAP | 0.005                                    | 0.0167                                            |
| AUCG BFM vs CAP                    | 0.005                                    | 0.0194                                            |
| GI BFM vs CAP                      | 0.005                                    | 0.0181                                            |
| AUCI BFM vs CAP                    | 0.009                                    | 0.0236                                            |
| II BFM vs CAP                      | 0.005                                    | 0.0153                                            |
| 0 glucose response BFM vs CAP      | 0.198                                    | 0.0361                                            |
| 15 min glucose response BFM vs CAP | 0.006                                    | 0.0236                                            |

|                                     |       |        |
|-------------------------------------|-------|--------|
| 30 min glucose response BFM vs CAP  | 0.51  | 0.0417 |
| 45 min glucose response BFM vs CAP  | 0.004 | 0.0139 |
| 60 min glucose response BFM vs CAP  | 0.008 | 0.0222 |
| 90 min glucose response BFM vs CAP  | 0.001 | 0.0014 |
| 120 min glucose response BFM vs CAP | 0.001 | 0.0028 |
| 0 insulin response BFM vs CAP       | 0.001 | 0.0083 |
| 15min insulin response BFM vs CAP   | 0.002 | 0.0097 |
| 30 min insulin response BFM vs CAP  | 0.221 | 0.0389 |
| 45 min insulin response BFM vs CAP  | 0.002 | 0.0125 |
| 60 min insulin response BFM vs CAP  | 0.001 | 0.0028 |
| 90 min insulin response BFM vs CAP  | 0.001 | 0.0042 |
| 120 min insulin response BFM vs CAP | 0.002 | 0.0097 |

<sup>1</sup>. CP = concept product; CAP = commercially available product; BFM = breakfast meal; AUCG = Area under the curve for blood glucose; AUCI = area under the curve for blood insulin; GI= Glycaemic index; II= Insulin index.
